# Supplementary material for: Limits of lockdown: characterising essential contacts during strict physical distancing
Source: bioRxiv or medRxiv preprint supplement (doi:10.1101/2021.03.12.21253484), 2021-03-13
Supplement: Supplementary file [file media-1.pdf]

## Supplementary Information

### Limits of lockdown: characterising essential contacts during strict physical distancing

Amy Thomas<sup>1\*</sup>, Leon Danon<sup>2,3,4</sup>, Hannah Christensen<sup>4,5</sup>, Kate Northstone<sup>6</sup>, Daniel Smith<sup>6,7</sup>, Emily Nixon<sup>1,8</sup>, Adam Trickey<sup>4</sup>, Gibran Hemani<sup>4</sup>, Sarah Sauchelli<sup>9</sup>, Adam Finn<sup>4,10</sup>, Nicholas Timpson<sup>6,7</sup>, Ellen Brooks-Pollock<sup>1,5\*</sup>

<sup>1</sup> Bristol Veterinary School, University of Bristol, Langford, UK

<sup>2</sup> Engineering Mathematics, University of Bristol, Bristol, UK

<sup>3</sup> Alan Turing Institute, British Library, NW1 2DB, London, UK

<sup>4</sup> Population Health Sciences, Bristol Medical School, University of Bristol, Bristol, UK

<sup>5</sup> National Institute for Health Research Health Protection Research Unit in Behavioural Science and Evaluation at the University of Bristol, Bristol, UK

<sup>6</sup> ALSPAC, Department of Population Health Sciences, Bristol Medical School, University of Bristol, Bristol, UK

<sup>7</sup> MRC Integrative Epidemiology Unit at University of Bristol, Bristol, UK

<sup>8</sup> School of Biological Sciences, University of Bristol, Bristol, UK

<sup>9</sup> National Institute for Health Research Bristol Biomedical Research Centre, University Hospitals of Bristol and Weston NHS Foundation Trust and University of Bristol, Bristol, UK

<sup>10</sup> Cellular and Molecular Medicine, University of Bristol, Bristol, UK

\*Corresponding author

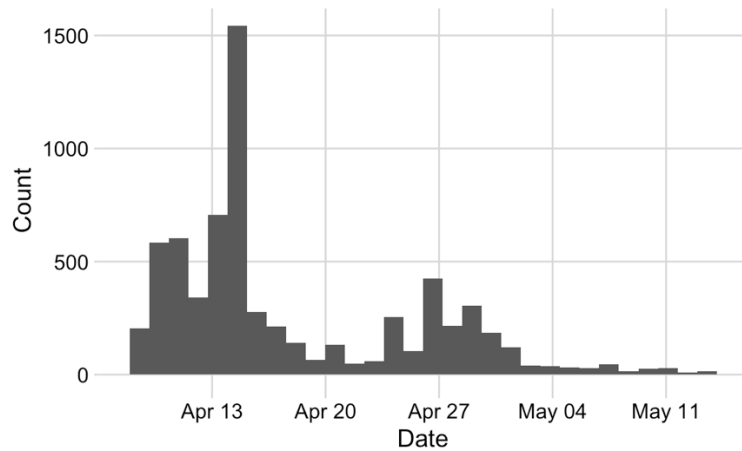

**Supplementary Figure 1: Frequency of questionnaire responses.** Responses received during the rollout period of 9th April 2020 to 14th May 2020; peaks coincide with invitation and reminder emails

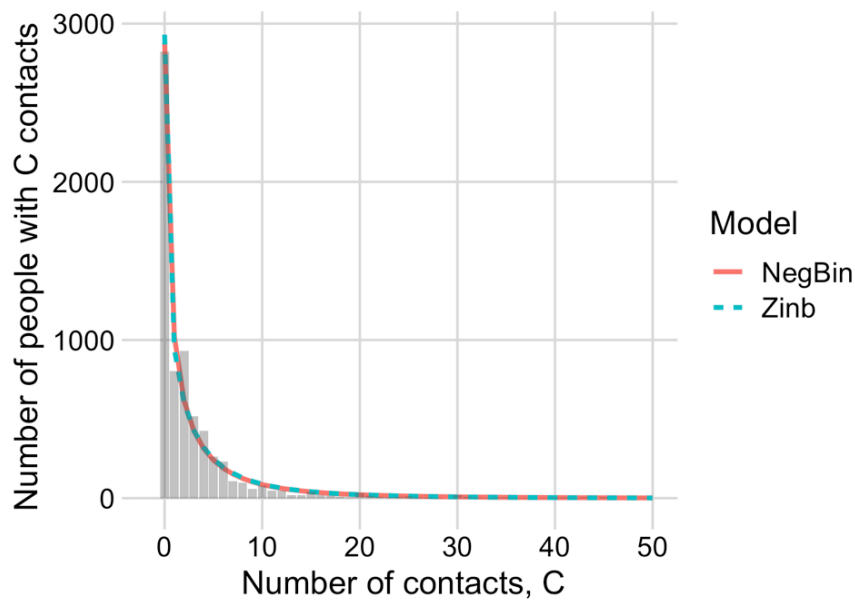

**Supplementary Figure 2: Model fit comparison.** Model fit plotted for negative binomial (NegBin), its zero inflated equivalent (Zinb) and observed counts. Proportion of observed zeros: 2825/6807 (41.5%); proportion of predicted zeros for negative binomial: 2881/6807 (42.3%) and zero inflated negative binomial: 2931/6807 (43.1%). Number of contacts truncated at 50.

**Supplementary Table 1: Characteristics of questionnaire participants in comparison to the South West and UK population.** Population estimates provided by ONS 2019 mid-year and 2011 census estimates

| Characteristic* | Questionnaire participants |      | ONS South West estimate | ONS UK estimate |
|-----------------|----------------------------|------|-------------------------|-----------------|
|                 | n                          | (%)  | (%)                     | (%)             |
| Sex             | 6807                       |      |                         |                 |
| Female          | 4895                       | 71.9 | 50.8                    | 50.6            |
| Male            | 1912                       | 28.1 | 49.2                    | 49.4            |
| Age†            | 6807                       |      |                         |                 |
| 23–29           | 3039                       | 44.6 | 12.9                    | 13.1            |
| 30–39           | 45                         | 0.7  | 16.1                    | 18.8            |
| 40–49           | 90                         | 1.3  | 16.4                    | 17.8            |
| 50–59           | 2107                       | 31.0 | 19.3                    | 19.2            |
| 60–69           | 1455                       | 21.4 | 16.4                    | 15.0            |
| 70+             | 71                         | 1.0  | 18.9                    | 16.1            |
| Ethnicity‡      | 6177                       |      |                         |                 |
| Non-white       | 137                        | 2.2  | 4.7                     | 12.9            |
| White           | 6040                       | 97.8 | 95.3                    | 87.1            |
| Unknown         | 630                        |      |                         |                 |

\*Data for sex and age from the ONS 2019 mid-year estimates[1]

†No participants were aged under 23 years of age, percentages of age groups in the observed sample only were compared to ONS data. The 70+ age group was censored at 85.

‡Ethnicity data from the 2011 census for South West and UK populations[2]

## References

1. Office-for-National-Statistics. Office for National Statistics. Population estimates for the UK, England and Wales, Scotland and Northern Ireland: mid-2019, using April 2020 local authority district codes. 2021
2. Office-for-national-statistics. Census 2011. KS201 UK, Ethnic group. 2011.
